# Supplementary material for: Osteogenic capacity and cytotherapeutic potential of periodontal ligament cells for periodontal regeneration in vitro and in vivo
Source: PeerJ. 2019 Mar 8;7:e6589. doi: 10.7717/peerj.6589 (PMC6410690; doi:10.7717/peerj.6589)
Supplement: Supplemental Information 1 [file peerj-07-6589-s001.xlsx]

## Sheet: Fig1
MTT assay
	PDLCs		hMSCs
Day	OD at 570nm	STDEV	OD at 570nm	STDEV
1	0.143	0.01715	0.123	0.01223
2	0.235	0.02175	0.185	0.02032
3	0.378	0.0389	0.258	0.02835
4	0.483	0.04415	0.363	0.03879
5	0.592	0.0496	0.432	0.0524
6	0.718	0.0459	0.557	0.0549
7	0.789	0.04945	0.589	0.0484
8	0.813	0.04065	0.603	0.0423

## Sheet: Fig2
ALP activity
		Control			OS-14days
		PDLCs	hMSCs		PDLCs	hMSCs
ALP(U/gprot)	Duplicate-1	0.495866	0.548686		1.53702	2.24353
	Duplicate-2	0.515876	0.568486		1.61912	2.34653
	Duplicate-3	0.465866	0.536586		1.45512	2.14653
Von kossa staining
	PDLCs	hMSCs
mineralized nudules(number/field)	20	58
	18	65
	23	43
Alizarin red S staining
	PDLCs	hMSCs
mineralized nudules(number/field)	32	78
	25	82
	35	92

## Sheet: Fig3
real-time PCR
		Control			Osteo-induction
		PDLCs	hMSCs		PDLCs	hMSCs
RUNX2 Cq	Duplicate-1	25.8139	25.6851		24.5106	24.9649
	Duplicate-2	25.8196	25.5765		24.3578	24.7835
	Duplicate-3	25.6203	25.5033		24.3793	24.691
ALP Cq	Duplicate-1	26.3815	25.7238		25.2498	25.1403
	Duplicate-2	26.2972	25.5821		25.0888	25.0733
	Duplicate-3	26.2547	25.5802		25.0643	25.0409
OCN Cq	Duplicate-1	25.8649	25.8133		27.9127	26.0399
	Duplicate-2	25.8418	25.6091		27.5382	25.9519
	Duplicate-3	25.7181	25.5385		27.6035	25.886
ColI Cq	Duplicate-1	25.5688	25.6796		23.8703	24.9095
	Duplicate-2	25.4936	25.4314		23.8186	24.7598
	Duplicate-3	25.458	25.3851		23.8308	24.8252
BSP Cq	Duplicate-1	26.238	25.9095		24.5761	23.6874
	Duplicate-2	26.1317	25.7598		24.3524	23.6437
	Duplicate-3	26.11	25.8252		24.8906	23.3734
OPN Cq	Duplicate-1	24.6438	24.5761		23.6874	23.9051
	Duplicate-2	24.7103	24.3524		23.6437	23.454
	Duplicate-3	24.4286	24.8906		23.3734	23.3155
β-actin Cq	Duplicate-1	18.559	18.7059		18.6039	18.0181
	Duplicate-2	18.1442	18.4467		18.2988	18.0933
	Duplicate-3	18.2191	18.6618		18.0956	17.8745
